# Supplementary material for: Genome-wide analysis of the heat shock transcription factor family reveals saline-alkali stress responses in Xanthoceras sorbifolium
Source: PeerJ. 2023 Sep 22;11:e15929. doi: 10.7717/peerj.15929 (PMC10519200; doi:10.7717/peerj.15929)
Supplement: Supplemental Information 3 [file peerj-11-15929-s003.xlsx]

## Sheet: Sheet1
		HSF1
	CK-L	CK-R	NACl-L	NACL-R	NAHCO3-L	NAHCO3_R
Ct	21.8048	24.3757	23.2819	22.8948	24.5895	24.7149
	23.1238	24.0397	22.6586	22.8166	24.3174	23.6237
	22.537	23.8299	22.3448	22.107	23.8962	23.5
reference gene Ct	15.9997	16.9424	15.4742	15.469	14.5087	15.4344
	14.9135	16.5944	16.3561	14.5911	16.2058	16.776
	15.7567	15.2958	16.2077	15.9729	15.3775	14.4862
dct	5.80518	7.4333	7.80768	7.42586	10.0808	9.28053
	8.21033	7.44526	6.30257	8.22551	8.11157	6.84773
	6.78033	8.5341	6.13709	6.13411	8.51868	9.01381
ddct	0	1.62812	2.0025	1.62068	4.27557	3.47535
	2.40514	1.64008	0.49739	2.42033	2.30638	1.04255
	-1.43	2.72892	0.331906	0.328925	2.7135	3.20862
﹣ddct	0	-1.62812	-2.0025	-1.62068	-4.27557	-3.47535
	-2.40514	-1.64008	-0.49739	-2.42033	-2.30638	-1.04255
	1.43	-2.72892	-0.331906	-0.328925	-2.7135	-3.20862
2﹣ddct	1	0.323509	0.249567	0.325182	0.0516328	0.0899116
	0.18879	0.320838	0.708387	0.186814	0.202167	0.485469
	2.69446	0.150839	0.794486	0.796129	0.15246	0.10817
average	1.29442	0.265062	0.584147	0.436042	0.13542	0.22785
stedv	0.347969	0.026925	0.114705	0.152329	0.0208751	0.0607721
	1	1	0.451281	1.64505	0.104618	0.390056
		HSF2
	CK-L	CK-R	NACl-L	NACL-R	NAHCO3-L	NAHCO3_R
Ct	23.7378	24.3801	24.7146	24.9805	26.1623	27.1952
	23.917	24.0044	24.5664	25.2451	25.9987	27.37
	24.2553	24.7697	24.9542	25.8653	26.28	26.9796
reference gene Ct	15.9997	16.9424	15.4742	15.469	14.5087	15.4344
	14.9135	16.5944	16.3561	14.5911	16.2058	16.776
	15.7567	15.2958	16.2077	15.9729	15.3775	14.4862
dct	7.73814	7.43769	9.24038	9.51155	11.6536	11.7608
	9.00354	7.40993	8.21031	10.654	9.79288	10.5941
	8.49858	9.4739	8.74647	9.89231	10.9026	12.4935
ddct	0	-0.30045	1.50224	1.77341	3.91545	4.02271
	1.2654	-0.328212	0.472169	2.91591	2.05474	2.85594
	-0.504963	1.73576	1.00833	2.15417	3.16442	4.75531
﹣ddct	0	0.30045	-1.50224	-1.77341	-3.91545	-4.02271
	-1.2654	0.328212	-0.472169	-2.91591	-2.05474	-2.85594
	0.504963	-1.73576	-1.00833	-2.15417	-3.16442	-4.75531
2﹣ddct	1	1.23153	0.353004	0.292517	0.0662725	0.061524
	0.415983	1.25546	0.72088	0.132502	0.240692	0.138127
	1.41909	0.300251	0.497122	0.224662	0.111536	0.0370261
average	0.945023	0.929079	0.523669	0.21656	0.1395	0.0788922
stedv	0.137119	0.148252	0.0919689	0.0230398	0.0246337	0.0143542
	1	1	0.554133	0.233092	0.147616	0.0849145
		HSF3
	CK-L	CK-R	NACl-L	NACL-R	NAHCO3-L	NAHCO3_R
Ct	23.7378	24.3801	24.7146	24.9805	26.1623	27.1952
	23.917	24.0044	24.5664	25.2451	25.9987	27.37
	24.2553	24.7697	24.9542	25.8653	26.28	26.9796
reference gene Ct	15.9997	16.9424	15.4742	15.469	14.5087	15.4344
	14.9135	16.5944	16.3561	14.5911	16.2058	16.776
	15.7567	15.2958	16.2077	15.9729	15.3775	14.4862
dct	7.73814	7.43769	9.24038	9.51155	11.6536	11.7608
	9.00354	7.40993	8.21031	10.654	9.79288	10.5941
	8.49858	9.4739	8.74647	9.89231	10.9026	12.4935
ddct	0	-0.30045	1.50224	1.77341	3.91545	4.02271
	1.2654	-0.328212	0.472169	2.91591	2.05474	2.85594
	-0.504963	1.73576	1.00833	2.15417	3.16442	4.75531
﹣ddct	0	0.30045	-1.50224	-1.77341	-3.91545	-4.02271
	-1.2654	0.328212	-0.472169	-2.91591	-2.05474	-2.85594
	0.504963	-1.73576	-1.00833	-2.15417	-3.16442	-4.75531
2﹣ddct	1	1.23153	0.353004	0.292517	0.0662725	0.061524
	0.415983	1.25546	0.72088	0.132502	0.240692	0.138127
	1.41909	0.300251	0.497122	0.224662	0.111536	0.0370261
average	0.945023	0.929079	0.523669	0.21656	0.1395	0.0788922
stedv	0.137119	0.148252	0.0919689	0.0230398	0.0246337	0.0143542
	1	1	0.554133	0.233092	0.147616	0.0849145
		HSF5
	CK-L	CK-R	NACl-L	NACL-R	NAHCO3-L	NAHCO3_R
Ct	21.7537	21.5409	21.5932	21.9646	21.8845	21.0063
	19.4799	21.3617	21.7719	20.593	21.1145	21.8738
	21.933	21.2967	22.22	22.0923	21.4891	21.275
reference gene Ct	15.9997	16.9424	15.4742	15.469	14.5087	15.4344
	14.9135	16.5944	16.3561	14.5911	16.2058	16.776
	15.7567	15.2958	16.2077	15.9729	15.3775	16.4862
dct	5.75406	4.59856	6.11902	6.4956	7.37578	5.57198
	4.56647	4.76723	5.41582	6.00191	4.90866	5.09786
	6.17635	6.00089	6.01235	6.1194	6.11165	4.78885
ddct	0	-1.1555	0.364955	0.741541	1.62171	-0.182086
	-1.18759	-0.986836	-0.338244	0.247842	-0.845403	-0.656199
	1.60988	0.246823	0.258288	0.365335	0.357583	-0.965211
﹣ddct	0	1.1555	-0.364955	-0.741541	-1.62171	0.182086
	1.18759	0.986836	0.338244	-0.247842	0.845403	0.656199
	-1.60988	-0.246823	-0.258288	-0.365335	-0.357583	0.965211
2﹣ddct	1	2.22761	0.776493	0.5981	0.324949	1.13452
	2.27773	1.98183	1.26422	0.842155	1.79677	1.57593
	0.327625	0.84275	0.836079	0.776289	0.780471	1.95235
average	1.20178	1.68407	0.95893	0.738848	0.967396	1.55427
stedv	0.269603	0.201101	0.121931	0.0610138	0.367954	0.110351
	1	1	0.797922	0.438729	0.804966	0.922924
		HSF7
	CK-L	CK-R	NACl-L	NACL-R	NAHCO3-L	NAHCO3_R
Ct	25.2363	24.8509	24.1083	24.5169	25.809	26.7674
	25.0281	24.7191	24.397	24.5504	25.4922	26.4182
	24.783	24.5163	23.9884	24.2495	25.9251	26.5133
reference gene Ct	19.7697	19.7842	19.6466	19.2387	19.7141	19.4139
	19.9103	19.584	19.3691	19.308	20.4578	19.7304
	20.1138	19.5137	19.3034	19.8098	20.2122	19.3875
dct	5.46657	5.06679	4.46173	5.27818	6.09489	7.35347
	5.11778	5.13509	5.02787	5.24245	5.03439	6.68781
	4.66924	5.00261	4.68502	4.4397	5.71291	7.12584
ddct	0	-0.399778	-1.00484	-0.188383	0.628323	1.8869
	-0.348785	-0.331476	-0.438694	-0.224117	-0.432175	1.22124
	-0.448542	-0.463959	-0.781544	-1.02687	0.246346	1.65927
﹣ddct	0	0.399778	1.00484	0.188383	-0.628323	-1.8869
	0.348785	0.331476	0.438694	0.224117	0.432175	-1.22124
	0.448542	0.463959	0.781544	1.02687	-0.246346	-1.65927
2﹣ddct	1	1.31931	2.00672	1.13949	0.646928	0.270387
	1.27349	1.2583	1.35538	1.16806	1.34927	0.428913
	1.36466	1.37932	1.71897	2.03759	0.843029	0.316599
average	1.21272	1.31898	1.69369	1.44838	0.946408	0.338633
stedv	0.0516499	0.0164691	0.162835	0.217383	0.0986332	0.022189
	1	1.08762	1.39661	1.19433	0.780403	0.279235
		HSF8
	CK-L	CK-R	NACl-L	NACL-R	NAHCO3-L	NAHCO3_R
Ct	24.3901	23.9809	24.3291	23.4144	25.62	25.4444
	24.9027	23.5793	23.8168	23.1731	25.6917	24.5488
	24.4157	22.649	23.7833	23.1404	25.5504	24.9281
reference gene Ct	19.7697	19.7842	20.6466	19.2387	19.7141	19.4139
	19.9103	19.584	20.3691	19.308	20.4578	19.7304
	20.1138	19.5137	20.3034	19.8098	20.2122	19.3875
dct	4.62037	4.19679	3.68246	4.17575	5.90589	6.03047
	4.99244	3.9953	3.44769	3.86513	5.23388	4.81843
	4.30187	3.13536	3.47989	3.33058	5.33826	5.54068
ddct	0	-0.423576	-0.937906	-0.44462	1.28552	1.4101
	0.372072	-0.625069	-1.17267	-0.755241	0.613512	0.198061
	-0.690573	-1.48501	-1.14048	-1.28978	0.717897	0.920313
﹣ddct	0	0.423576	0.937906	0.44462	-1.28552	-1.4101
	-0.372072	0.625069	1.17267	0.755241	-0.613512	-0.198061
	0.690573	1.48501	1.14048	1.28978	-0.717897	-0.920313
2﹣ddct	1	1.34125	1.91575	1.36096	0.410222	0.376285
	0.772672	1.54228	2.25429	1.68791	0.653604	0.871721
	1.61392	2.79919	2.20454	2.44491	0.607983	0.528394
average	1.12887	1.89424	2.12486	1.83126	0.55727	0.592134
stedv	0.118441	0.215046	0.0846357	0.18925	0.035211	0.069074
	1	1.678	1.88229	1.62221	0.493655	0.524539
		HSF9
	CK-L	CK-R	NACl-L	NACL-R	NAHCO3-L	NAHCO3_R
Ct	28.1213	27.0464	27.136	26.4697	27.9895	27.6977
	28.2998	27.0686	27.2755	26.9129	27.9305	28.3086
	28.1236	26.8726	27.3391	26.6904	28.33	28.0195
reference gene Ct	19.7697	19.7842	19.6466	19.2387	19.7141	19.4139
	19.9103	19.584	19.3691	19.308	20.4578	19.7304
	20.1138	19.5137	19.3034	19.8098	20.2122	19.3875
dct	8.35156	7.26222	7.4894	7.23103	8.27531	8.28376
	8.38948	7.48455	7.90635	7.60492	7.47268	8.57824
	8.00984	7.35889	8.03572	6.88059	8.11783	8.63206
ddct	0	-1.08935	-0.862162	-1.12054	-0.0762558	-0.0678043
	0.0379181	-0.86701	-0.445219	-0.746643	-0.87888	0.226671
	-0.379642	-0.99267	-0.315845	-1.47098	-0.233736	0.280495
﹣ddct	0	1.08935	0.862162	1.12054	0.0762558	0.0678043
	-0.0379181	0.86701	0.445219	0.746643	0.87888	-0.226671
	0.379642	0.99267	0.315845	1.47098	0.233736	-0.280495
2﹣ddct	1	2.12778	1.81776	2.17428	1.05428	1.04812
	0.97406	1.82388	1.36152	1.67788	1.83895	0.854604
	1.30102	1.98986	1.24474	2.77209	1.17588	0.823309
average	1.09169	1.98051	1.47467	2.20809	1.35637	0.908678
stedv	0.0494648	0.0414142	0.11406	0.273552	0.114942	0.0331417
表达量	1	1.81416	1.35081	2.02262	1.24244	0.832357
		HSF10
	CK-L	CK-R	NACl-L	NACL-R	NAHCO3-L	NAHCO3_R
Ct	25.2363	24.8509	23.1083	24.5169	25.809	26.7674
	25.0281	24.7191	23.397	24.5504	25.4922	26.4182
	24.783	24.5163	22.9884	24.2495	25.9251	26.5133
reference gene Ct	19.7697	19.7842	19.6466	19.2387	19.7141	19.4139
	19.9103	19.584	19.3691	19.308	20.4578	19.7304
	20.1138	19.5137	19.3034	19.8098	20.2122	19.3875
dct	5.46657	5.06679	3.46173	5.27818	6.09489	7.35347
	5.11778	5.13509	4.02787	5.24245	5.03439	6.68781
	4.66924	5.00261	3.68502	4.4397	5.71291	7.12584
ddct	0	-0.399778	-2.00484	-0.188383	0.628323	1.8869
	-0.348785	-0.331476	-1.43869	-0.224117	-0.432175	1.22124
	-0.448542	-0.463959	-1.78154	-1.02687	0.246346	1.65927
﹣ddct	0	0.399778	2.00484	0.188383	-0.628323	-1.8869
	0.348785	0.331476	1.43869	0.224117	0.432175	-1.22124
	0.448542	0.463959	1.78154	1.02687	-0.246346	-1.65927
2﹣ddct	1	1.31931	4.01343	1.13949	0.646928	0.270387
	1.27349	1.2583	2.71075	1.16806	1.34927	0.428913
	1.36466	1.37932	3.43794	2.03759	0.843029	0.316599
average	1.21272	1.31898	3.38738	1.44838	0.946408	0.338633
stedv	0.0516499	0.0164691	0.32567	0.217383	0.0986332	0.022189
	1	1.08762	2.79321	1.19433	0.780403	0.279235
		HSF11
	CK-L	CK-R	NACl-L	NACL-R	NAHCO3-L	NAHCO3_R
Ct	25.4732	24.6306	22.9237	25.4724	25.7165	26.295
	25.4224	24.4115	23.7449	24.7879	25.6076	25.7335
	24.9566	24.2096	23.6681	24.9179	25.3201	26.275
reference gene Ct	21.2501	19.7841	20.5523	20.6079	20.7954	19.5632
	20.8408	20.594	20.682	20.0999	20.5486	19.4461
	20.7219	20.1547	20.2972	19.6166	20.4299	19.5238
dct	4.22309	4.84649	2.37144	4.86452	4.92113	6.73183
	4.58166	3.81746	3.0629	4.68808	5.05896	6.28738
	4.23472	4.05488	3.37092	5.30131	4.89013	6.75127
ddct	0	0.623392	-1.85166	0.641432	0.698034	2.50874
	0.35857	-0.40563	-1.16019	0.464983	0.835871	2.06428
	0.0116272	-0.168211	-0.852171	1.07822	0.667032	2.52817
﹣ddct	0	-0.623392	1.85166	-0.641432	-0.698034	-2.50874
	-0.35857	0.40563	1.16019	-0.464983	-0.835871	-2.06428
	-0.0116272	0.168211	0.852171	-1.07822	-0.667032	-2.52817
2﹣ddct	1	0.649143	3.60915	0.641076	0.616412	0.175709
	0.779937	1.32467	2.23488	0.72448	0.560245	0.239105
	0.991973	1.12366	1.80522	0.473613	0.629801	0.173358
average	0.92397	1.03249	2.54975	0.613056	0.602152	0.196057
stedv	0.0339664	0.0944056	0.343568	0.0208508	0.0140417	0.015849
	1	1	2.75955	0.593764	0.651701	0.189888
		HSF13
	CK-L	CK-R	NACl-L	NACL-R	NAHCO3-L	NAHCO3_R
Ct	31.4694	30.9046	31.2431	30.9351	31.949	33.9428
	31.3925	30.7878	31.8534	31.4199	31.8082	33.6397
	30.6775	30.9661	31.0524	30.8046	30.9671	33.9104
reference gene Ct	21.2501	19.7841	20.5523	20.6079	20.7954	19.5632
	20.8408	20.594	20.682	20.0999	20.5486	19.4461
	20.7219	20.1547	20.2972	19.6166	20.4299	19.5238
dct	10.2193	11.1204	10.6908	10.3273	11.1536	14.3797
	10.5517	10.1938	11.1713	11.32	11.2596	14.1936
	9.95562	10.8114	10.7552	11.1881	10.5372	14.3866
ddct	0	0.9011	0.471489	0.107935	0.934267	4.16032
	0.332399	-0.0255451	0.952009	1.10068	1.04025	3.9743
	-0.263714	0.592024	0.535892	0.968718	0.317873	4.16728
﹣ddct	0	-0.9011	-0.471489	-0.107935	-0.934267	-4.16032
	-0.332399	0.0255451	-0.952009	-1.10068	-1.04025	-3.9743
	0.263714	-0.592024	-0.535892	-0.968718	-0.317873	-4.16728
2﹣ddct	1	0.535478	0.72122	0.927915	0.523308	0.0559265
	0.794215	1.01786	0.516912	0.466296	0.486244	0.0636234
	1.20057	0.663412	0.689732	0.51096	0.802252	0.0556576
average	0.99826	0.738918	0.642621	0.635057	0.603935	0.0584025
stedv	0.0552989	0.0680141	0.0510769	0.115405	0.00926601	0.00192423
	1	1	0.643741	0.859442	0.604987	0.0790379
		HSF15
	CK-L	CK-R	NACl-L	NACL-R	NAHCO3-L	NAHCO3_R
Ct	27.1724	25.8362	23.9081	26.2015	26.5545	27.449
	26.5093	25.7892	23.9822	26.1093	25.9882	27.3652
	26.6177	25.7505	23.9316	26.6405	26.9567	27.5104
reference gene Ct	21.2501	19.7841	20.5523	20.6079	20.7954	19.5632
	20.8408	20.594	20.682	20.0999	20.5486	19.4461
	20.7219	20.1547	20.2972	19.6166	20.4299	19.5238
dct	5.92236	6.05204	3.35582	5.59362	5.75905	7.88589
	5.66858	5.19519	3.30019	6.00941	5.43962	7.9191
	5.89586	5.59579	3.63444	7.02397	6.52682	7.98661
ddct	0	0	-2.56654	-0.45842	-0.163307	1.83386
	-0.25378	-0.856842	-2.62217	-0.0426311	-0.482742	1.86706
	-0.0265007	-0.456249	-2.28792	0.971931	0.604458	1.93458
﹣ddct	0	0	2.56654	0.45842	0.163307	-1.83386
	0.25378	0.856842	2.62217	0.0426311	0.482742	-1.86706
	0.0265007	0.456249	2.28792	-0.971931	-0.604458	-1.93458
2﹣ddct	1	1	5.92388	1.37404	1.11985	0.280513
	1.19233	1.81107	6.15674	1.02999	1.3974	0.274131
	1.01854	1.37197	4.88351	0.509823	0.657718	0.261598
average	1.07029	1.39435	5.65471	0.971283	1.05832	0.272081
stedv	0.0288752	0.110499	0.0582148	0.0860114	0.0693865	0.00159555
	1	1	5.28335	0.696587	0.98882	0.195131
		HSF17
	CK-L	CK-R	NACl-L	NACL-R	NAHCO3-L	NAHCO3_R
Ct	23.8906	25.2558	24.2035	26.1178	25.0502	28.0218
	23.8368	25.1234	24.1772	26.2428	24.9168	28.1564
	23.8999	25.3293	24.8093	26.1978	25.0726	28.1104
reference gene Ct	21.2501	19.7841	20.5523	20.6079	20.7954	19.5632
	20.8408	20.594	20.682	20.0999	20.5486	19.4461
	20.7219	20.1547	20.2972	19.6166	20.4299	19.5238
dct	2.6405	5.47164	3.65123	5.50997	4.2548	8.45863
	2.99601	4.52937	3.49519	6.14299	4.36817	8.71033
	3.17796	5.17456	4.51209	6.58127	4.64266	8.58661
ddct	0	2.83114	1.01073	2.86947	1.61431	5.81813
	0.355509	1.88887	0.854694	3.5025	1.72767	6.06983
	0.537466	2.53406	1.87159	3.94078	2.00216	5.94612
﹣ddct	0	-2.83114	-1.01073	-2.86947	-1.61431	-5.81813
	-0.355509	-1.88887	-0.854694	-3.5025	-1.72767	-6.06983
	-0.537466	-2.53406	-1.87159	-3.94078	-2.00216	-5.94612
2﹣ddct	1	0.140521	0.496295	0.136837	0.326622	0.0177243
	0.781594	0.270018	0.552982	0.0882355	0.301939	0.0148867
	0.68898	0.172652	0.273272	0.065119	0.249625	0.0162196
average	0.823525	0.194397	0.44085	0.0967305	0.292729	0.0162769
stedv	0.0434631	0.0183526	0.0402448	0.00996285	0.0107005	0.000386381
	1	1	0.535321	0.497593	0.355458	0.08373
		HSF18
	CK-L	CK-R	NACl-L	NACL-R	NAHCO3-L	NAHCO3_R
Ct	26.8419	24.5131	25.6084	24.8471	25.6654	25.4881
	26.2936	24.7779	25.2258	24.4991	25.1269	26.9361
	26.6312	24.8938	25.5641	24.2931	25.1817
reference gene Ct	22.7797	20.6077	21.5502	19.4904	20.9736	20.5974
	22.7048	20.7492	20.8988	19.457	21.5679	21.0527
	22.9282	20.4665	21.4215	19.3046	21.2629
dct	4.06218	3.90534	4.05823	5.35672	4.69172	4.89067
	3.58881	4.02873	4.32695	5.04205	3.55902	5.88345
	3.70305	4.42734	4.14254	4.98843	3.91881
ddct	0	-0.156837	-0.00395203	1.29454	0.629545	0.828493
	-0.473366	-0.0334454	0.264776	0.979872	-0.503159	1.82127
	-0.359131	0.36516	0.0803623	0.926249	-0.143364
﹣ddct	0	0.156837	0.00395203	-1.29454	-0.629545	-0.828493
	0.473366	0.0334454	-0.264776	-0.979872	0.503159	-1.82127
	0.359131	-0.36516	-0.0803623	-0.926249	0.143364
2﹣ddct	1	1.11484	1.00274	0.407665	0.64638	0.563117
	1.38834	1.02345	0.832328	0.507025	1.41731	0.282972
	1.28265	0.776383	0.94582	0.526225	1.10448
average	1.22367	0.971559	0.926964	0.480305	1.05606	0.423045
stedv	0.0546453	0.0476548	0.0426038	0.02484	0.192733	0.0700362
	1	1	0.75753	0.494365	0.863027	0.435429
		HSF20
	CK-L	CK-R	NACl-L	NACL-R	NAHCO3-L	NAHCO3_R
Ct	28.2421	28.2394	26.458	27.7145	28.8447	28.9216
	27.9171	28.1087	26.3285	27.6205	27.8226	29.1241
	28.1087	27.7816	26.6767	28.3592	27.5733	30.9607
reference gene Ct	22.7797	20.6077	22.5502	19.4904	20.9736	21.5974
	22.7048	20.7492	22.4215	19.457	21.5679	22.0527
	22.9282	20.4665	22.8988	19.3046	21.2629	22.0185
dct	5.46243	7.63169	3.90782	8.22409	7.87103	7.32413
	5.21233	7.35959	3.90691	8.16352	6.25472	7.07141
	5.18056	7.31515	3.77791	9.05456	6.31046	8.94225
ddct	0	2.16926	-1.55461	2.76167	2.4086	1.8617
	-0.250099	1.89716	-1.55552	2.70109	0.792294	1.60899
	-0.281866	1.85273	-1.68451	3.59213	0.848028	3.47982
﹣ddct	0	-2.16926	1.55461	-2.76167	-2.4086	-1.8617
	0.250099	-1.89716	1.55552	-2.70109	-0.792294	-1.60899
	0.281866	-1.85273	1.68451	-3.59213	-0.848028	-3.47982
2﹣ddct	1	0.222324	2.93754	0.147454	0.188339	0.275151
	1.18929	0.268471	2.93939	0.153777	0.577425	0.327828
	1.21577	0.276869	3.21432	0.0829203	0.555544	0.0896334
average	1.13502	0.255888	3.03042	0.12805	0.440436	0.230871
stedv	0.0320275	0.00799319	0.0433481	0.010672	0.0594944	0.0340531
	1	1	2.66993	0.500416	0.388043	0.902235
		HSF21
	CK-L	CK-R	NACl-L	NACL-R	NAHCO3-L	NAHCO3_R
Ct	25.6805	24.7293	24.7744	24.8006	24.6791	25.4822
	25.9672	24.9517	24.5737	24.0782	24.5122	25.5163
	25.8076	24.9526	24.935	24.2426	24.8384	25.1302
reference gene Ct	22.7797	20.6077	21.5502	19.4904	20.9736	21.5974
	22.7048	20.7492	20.8988	19.457	21.5679	22.0527
	22.9282	20.4665	21.4215	19.3046	21.2629
dct	2.9008	4.12159	3.22416	5.31014	3.70548	3.88471
	3.26242	4.20254	3.67485	4.6212	2.94432	3.46357
	2.87939	4.48615	3.51342	4.93796	3.57554
ddct	0	1.22079	0.323366	2.40934	0.80468	0.983915
	0.361624	1.30174	0.774055	1.7204	0.0435257	0.562773
	-0.0214081	1.58535	0.612617	2.03716	0.674738
﹣ddct	0	-1.22079	-0.323366	-2.40934	-0.80468	-0.983915
	-0.361624	-1.30174	-0.774055	-1.7204	-0.0435257	-0.562773
	0.0214081	-1.58535	-0.612617	-2.03716	-0.674738	0
2﹣ddct	1	0.429047	0.799203	0.188241	0.572489	0.505606
	0.778288	0.405636	0.584771	0.303465	0.970281	0.677
	1.01495	0.333243	0.654009	0.243643	0.626446
average	0.931079	0.389309	0.679328	0.245116	0.723072	0.591303
stedv	0.0360706	0.0135935	0.0536079	0.0288058	0.0994479	0.0428485
	1	1	0.729613	0.629619	0.776596	1.51885
