# Supplementary material for: Genome-wide analysis of the heat shock transcription factor family reveals saline-alkali stress responses in Xanthoceras sorbifolium
Source: PeerJ. 2023 Sep 22;11:e15929. doi: 10.7717/peerj.15929 (PMC10519200; doi:10.7717/peerj.15929)
Supplement: Supplemental Information 5 [file peerj-11-15929-s005.xlsx]

## Sheet: Sheet1
Primer name	Primers sequences
q-XsHSF1-F	GGAAGCCATGACCAAGAAAAG
q-XsHSF1-R	AGACTCCAAACCTGTAATTCCC
q-XsHSF2-F	GAGTTCATCTGTAGGTGCCTG
q-XsHSF2-R	CCCTCTTAAGCCTCTCAACTTC
q-XsHSF3-F	GATCTTGCAGATACTGGGACG
q-XsHSF3-R	AACAAGACCCTCAACTTCCTC
q-XsHSF5-F	GGTGTTTCAGTCATTGGCAG
q-XsHSF5-R	ATCTTCAGACAAGGCAGTCAC
q-XsHSF7-F	CAAACATGGAGCAGTTGGATTC
q-XsHSF7-R	GCAAGATACAGGCGGACTATC
q-XsHSF8-F	CGGGTTTGTGGTATGGTCTC
q-XsHSF8-R	TGGCGAATGAAGCTAGAGAAG
q-XsHSF9-F	TCAACAGCAACCTCCACTTC
q-XsHSF9-R	ACCTCTTCCTCAAGTCCAAAC
q-XsHSF10-F	GGGCTTTGACTGAAACTGAGAG
q-XsHSF10-R	TGTACTTGAAACTGGAACCCC
q-XsHSF11-F	AGGCGAATTTAGTAAGCGGAG
q-XsHSF11-R	GCCAATTGTTCCTGAGCTTTG
q-XsHSF14-F	GATGGGAGTTTGCTAATGAATACTTC
q-XsHSF14-R	CTGGTTGGAGAATCGATGGAG
q-XsHSF15-F	GCTGAACCGTATCTGTAGAAGG
q-XsHSF15-R	TGGTCAATTTTCTCACATGGTTC
q-XsHSF17-F	GTGAATCTACAGGACGGGAAG
q-XsHSF17-R	TCTCCTAAAACGCTTGACCC
q-XsHSF18-F	GACGATGTGATCTCCTGGAAC
q-XsHSF18-R	GAAAGCCGTAAGTGTTGAGTTG
q-XsHSF20-F	ATTCTTAGCCCGTCTTCAGC
q-XsHSF20-R	TTCACAATCTTCCCGTCCAC
q-XsHSF21-F	CAAACATGGAGCAGTTGGATTC
q-XsHSF21-R	GCAAGATACAGGCGGACTATC
q-GAPDH-F	GCCAAGACTATCCAACCT
q-GAPDH-R	GCAACCACATCAACATCAT
miR390a-F	GCGCTCGTTGTCCCTCTT
miR156g-F	CGCGCTGCTGCTTCTTTT
miR172a-F	GCGCGTCTCAGCATCTTCAG
miR164b-F	GCGTTAAGTTGCCCTGCC
miR390-st	GTCGTATCCAGTGCAGGGTCCGAGGTATTCGCACTGGATACGACAAACTA
miR156g-st	GTCGTATCCAGTGCAGGGTCCGAGGTATTCGCACTGGATACGACGCACAG
miR172a-st	GTCGTATCCAGTGCAGGGTCCGAGGTATTCGCACTGGATACGACGAAGTC
miR164b-st	GTCGTATCCAGTGCAGGGTCCGAGGTATTCGCACTGGATACGACTGGAAA
miRNA-R	AGTGCAGGGTCCGAGGTATT
5.8S rRNA-F	ACGTCTGCCTGGGTGTCACGC
